# Supplementary material for: Effects of Extracellular Vesicles from Blood-Derived Products on Osteoarthritic Chondrocytes within an Inflammation Model
Source: MDPI journal article supplement (doi:10.3390/ijms22137224), 2021-07-05
Supplement: s1 [file s1]

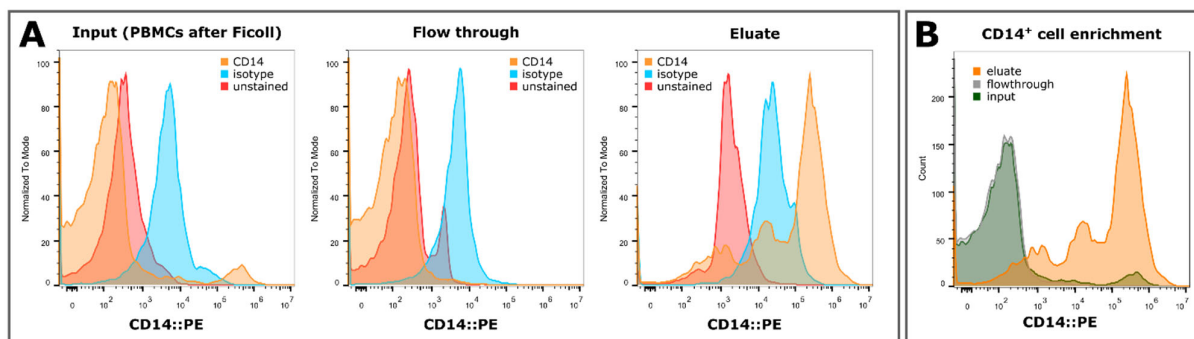

# Appendix A

**Figure S1.** Verification of CD14<sup>+</sup> monocyte isolation via flow cytometry. **(A)** Monitoring CD14<sup>+</sup> monocyte isolation via MACS by staining input, flowthrough, and eluate fractions to assess monocyte content. While flowthrough is devoid of CD14<sup>+</sup> cells, these cells are highly enriched in the eluate fraction. **(B)** Comparison of fractions stained with CD14 antibody to highlight the enrichment of CD14<sup>+</sup> cells in the eluate fraction.
